# Supplementary material for: The interplay between host genetics and the gut microbiome reveals common and distinct microbiome features for complex human diseases
Source: Springer Nature journal article supplement (doi:10.1186/s40168-020-00923-9), 2020-10-08

**Supplementary Figure 1 Genome-wide analysis results of taxa.** The red line in Manhattan plot indicates the threshold of  $5 \times 10^{-8}$  and the blue line indicates the threshold of  $5 \times 10^{-5}$ . Quantile-quantile plot (QQ-plot) shows observed  $-\log_{10}$  p-values with the expected  $-\log_{10}$  p-values. Blue dots show all SNPs and the red line indicates null hypothesis of no association. (A). Manhattan plot of all SNPs from genome-wide analysis of *Saccharibacteria*. (B). QQ-plot of all SNPs genome-wide analysis of *Saccharibacteria*. (C). Manhattan plot of all SNPs from genome-wide analysis of *Clostridiaceae*. (D). QQ-plot of all SNPs genome-wide analysis of *Clostridiaceae*. (E). Manhattan plot of all SNPs from genome-wide analysis of *Comamonadaceae*. (F). QQ-plot of all SNPs genome-wide analysis of *Comamonadaceae*. (G). Manhattan plot of all SNPs from genome-wide analysis of *Klebsiella*. (H). QQ-plot of all SNPs genome-wide analysis of *Klebsiella*. (I). Manhattan plot of all SNPs from genome-wide analysis of *Desulfovibrio d168*. (J). QQ-plot of all SNPs genome-wide analysis of *Desulfovibrio d168*.

**Supplementary Figure 2 Spearman's correlation of the relative abundance of AF-associated taxa with the relative level of diseases predicted by PICRUSt.** The grey components show no significance of correlation with Bonferroni correction ( $p > 0.05 / (5.6 \times 22)$ ,  $p > 0.0004$ ).

**Supplementary Figure 1 Genome-wide analysis results of taxa.** The red line in Manhattan plot indicates the threshold of  $5 \times 10^{-8}$  and the blue line indicates the threshold of  $5 \times 10^{-5}$ .

Quantile-quantile plot (QQ-plot) shows observed  $-\log_{10}$  p-values with the expected  $-\log_{10}$  p-values. Blue dots show all SNPs and the red line indicates null hypothesis of no association. (A). Manhattan plot of all SNPs from genome-wide analysis of *Saccharibacteria*. (B). QQ-plot of all SNPs genome-wide analysis of *Saccharibacteria*. (C). Manhattan plot of all SNPs from genome-wide analysis of *Clostridiaceae*. (D). QQ-plot of all SNPs genome-wide analysis of *Clostridiaceae*. (E). Manhattan plot of all SNPs from genome-wide analysis of *Comamonadaceae*. (F). QQ-plot of all SNPs genome-wide analysis of *Comamonadaceae*. (G). Manhattan plot of all SNPs from genome-wide analysis of *Klebsiella*. (H). QQ-plot of all SNPs genome-wide analysis of *Klebsiella*. (I). Manhattan plot of all SNPs from genome-wide analysis of *Desulfovibrio d168*. (J). QQ-plot of all SNPs genome-wide analysis of *Desulfovibrio d168*.

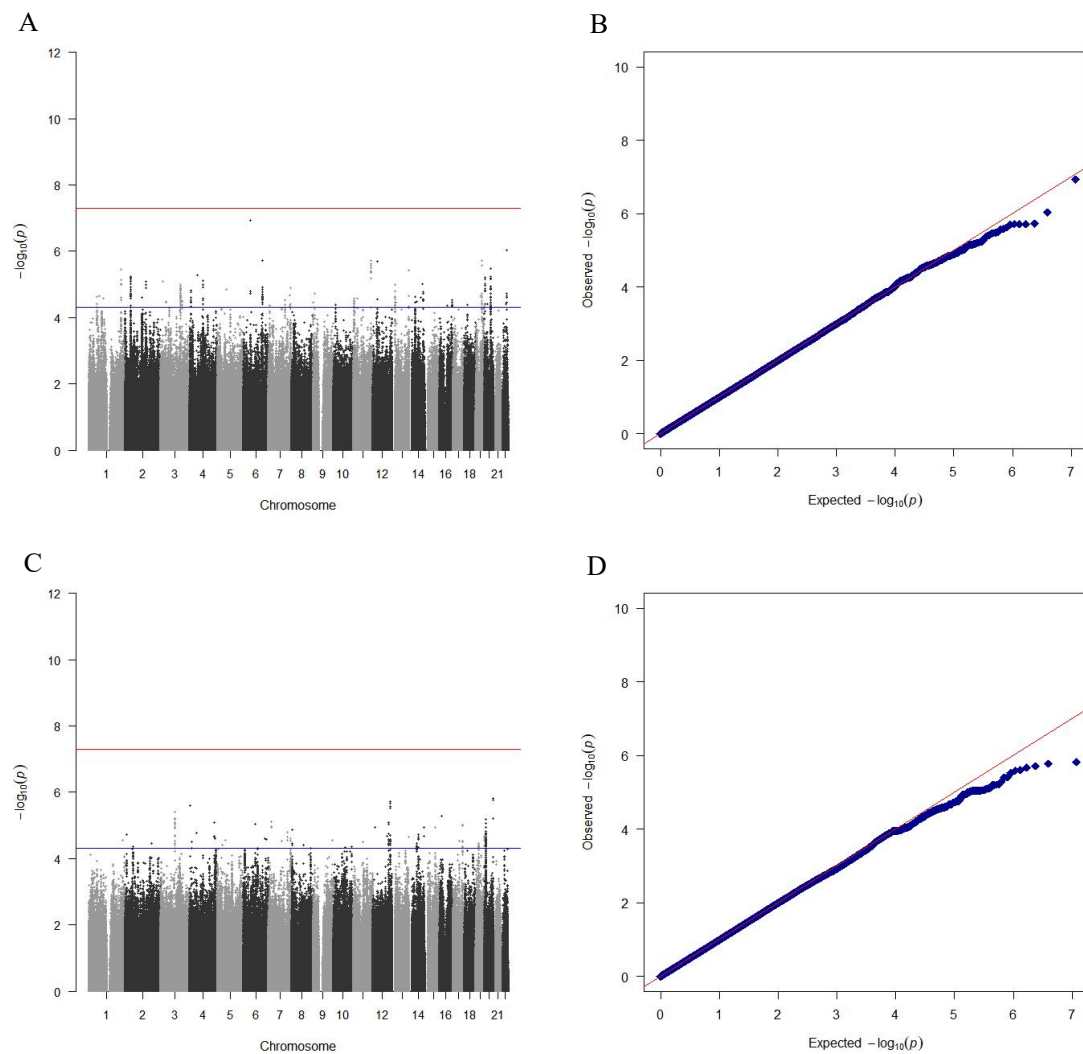

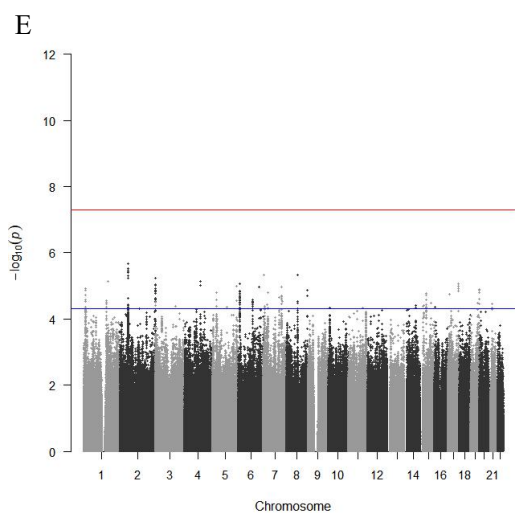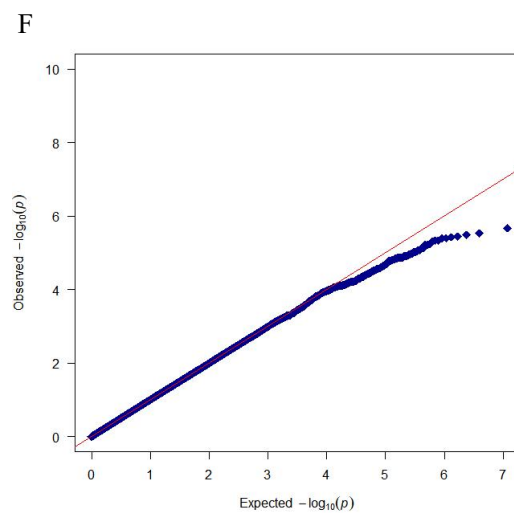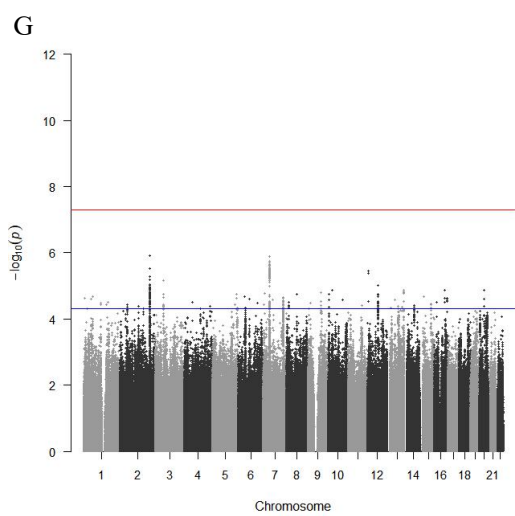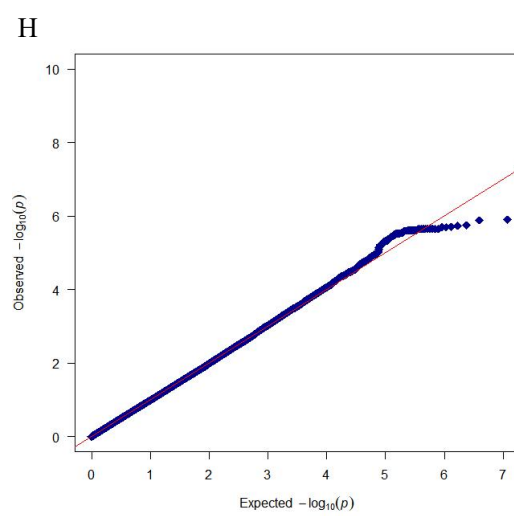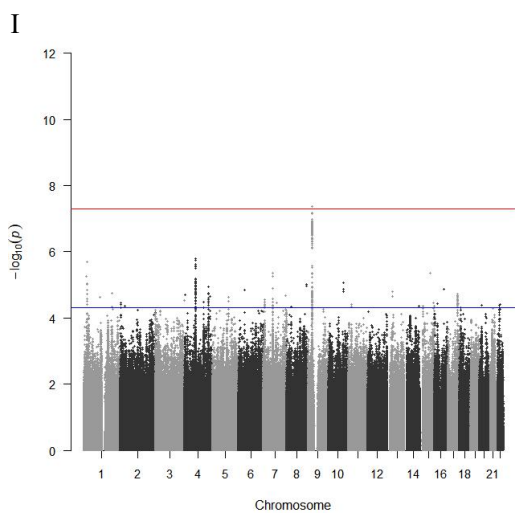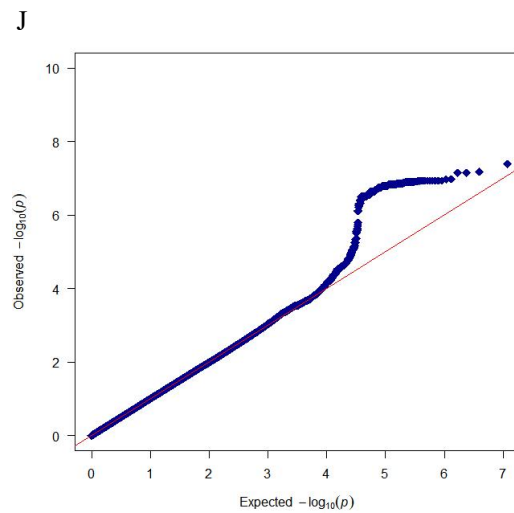

Supplement: MOESM2 [file 40168_2020_923_MOESM2_ESM.pdf]
